# Supplementary material for: Mono-(2-ethylhexyl) Phthalate (MEHP)-Induced Telomere Structure and Function Disorder Mediates Cell Cycle Dysregulation and Apoptosis via c-Myc and Its Upstream Transcription Factors in a Mouse Spermatogonia-Derived (GC-1) Cell Line
Source: MDPI journal article supplement (doi:10.3390/toxics11050448), 2023-05-10
Supplement: s1 [file s1]

## Supplemental Materials

Table S1. Primers' sequences for telomere genes and reference genes.

| Gene  | Forward primers (5'–3') | Reverse primers (5'–3') |
|-------|-------------------------|-------------------------|
| Telo  | CGGTTTGTTTGGGTTTGGGTTT  | GGCTTGCCTTACCCTTACCCT   |
|       | GGGTTTGGGTTTGGGTT       | TACCCTTACCCTTACCCT      |
| m36B4 | ACTGGTCTAGGACCCGAGAAG   | TCAATGGTGCCTCTGGAGATT   |

Table S2. Primers' sequences for various genes.

| Gene         | Forward primers (5'–3') | Reverse primers (5'–3') |
|--------------|-------------------------|-------------------------|
| <i>Cdk4</i>  | ATGGCTGCCACTCGATATGAA   | TGCTCCTCCATTAGGAACTCTC  |
| <i>Cdk6</i>  | TCTCACAGAGTAGTGCATCGT   | CGAGGTAAGGGCCATCTGAAAA  |
| <i>Ccnd1</i> | GCGTACCCTGACACCAATCTC   | CTCCTCTTCGCACTTCTGCTC   |
| <i>Rb1</i>   | TTGGAGTCCGATTGTATTACCGT | AGCACAGGCCAGTAAAGACAT   |
| <i>Trf1</i>  | CAGCAGTCTACAGAACTGAACC  | ACTGAAATCTGATGGAGCACG   |
| <i>Trf2</i>  | GGTGCTCAAGTTCTATTTCCACG | CAAGCAACGCCTGCATGAT     |
| <i>Pot1</i>  | AGCCTCCGTATGTTAGCAAAGG  | CCTGTGGAAGCGAACAATGT    |
| <i>Rap1</i>  | ATGCGTGAGTACAAGCTAGTAGT | AATCTACCTCGACTTGCTTTCTG |
| <i>Tin2</i>  | TGCCCTGAAGCATCACTTCC    | GGCAACTAGAAAGGATTCCCC   |
| <i>Tpp1</i>  | GAGTCTCACTTTTGCGCTGAA   | CTCCAGGGTTAGGTACTTTCCA  |
| <i>Tert</i>  | GCACTTTGGTTGCCCAATG     | GCACGTTTCTCTCGTTGCG     |
| <i>c-Myc</i> | ATGCCCCTCAACGTGAACTTC   | GTCGCAGATGAAATAGGGCTG   |
| <i>Max</i>   | CAAGCGGGCTCACCATAATG    | TGTTGCTTTGTCTAGGATTTGGG |
| <i>Stat3</i> | CACCTTGATTGAGAGTCAAGAC  | AGGAATCGGCTATATTGCTGGT  |
| <i>C-jun</i> | TTCCTCCAGTCCGAGAGCG     | TGAGAAGGTCCGAGTTCTTGG   |
| <i>Foxa1</i> | ACATTCAAGCGCAGCTACCC    | TGCTGGTTCTGGCGGTAATAG   |
| <i>Esr1</i>  | GACCCTTCACACCAAAGCCTC   | TGTCCACGTATACCTCGCCC    |
| <i>Ctcf</i>  | GATCCTACCCTTCTCCAGATGAA | GTACCGTCACAGGAACAGGT    |
| <i>actin</i> | CGTGCGTGACATCAAAGAGAAG  | CAAGAAGGAAGGCTGGAAAAGA  |

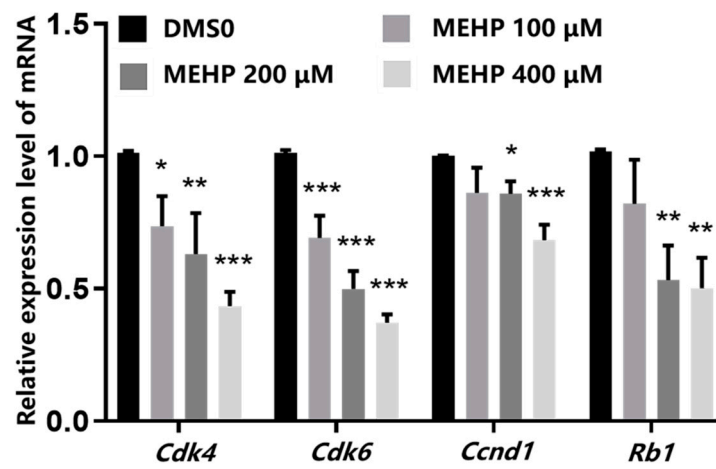

Figure S1. Changes in the mRNA expression levels of *Cdk4*, *Cdk6*, *Ccnd1*, and *Rb1* in GC-1 cells after 48 h of MEHP treatment were analysed by RT-qPCR. *Beta-actin* ( $\beta$ -*actin*) was used as the housekeeper gene. The results are presented as the mean  $\pm$  SD,  $n = 3$ . \* $P < 0.05$ , \*\* $P < 0.01$ , \*\*\* $P < 0.001$ , compared with the solvent control (DMSO) group.
